# Supplementary material for: Successful field performance in warm and dry environments of soybean expressing the sunflower transcription factor HB4
Source: PubMed Central journal article supplement (PMC7260725; doi:10.1093/jxb/eraa064), 2020-03-06
Supplement: eraa064_suppl_supplementary_figures_s1_s3_table_s1.pdf [file eraa064_suppl_supplementary_figures_s1_s3_table_s1.pdf]

Successful field performance in dry-warm environments of soybean expressing the sunflower transcription factor HaHB4

Ribichich KF<sup>a#</sup>, Chiozza M<sup>b#</sup>, Ávalos-Britez S<sup>cz</sup>, Cabello JV<sup>az</sup>, Arce AL<sup>az</sup>, Watson G<sup>b</sup>, Arias C<sup>d</sup>, Portapila M<sup>d</sup>, Trucco F<sup>b</sup>, Otegui ME<sup>e\*</sup>, Chan RL<sup>a\*</sup>

Supplementary Figures 1-3 & Table S1

### Supplementary Figure 1.

#### Response of seed yield and seed yield components of W82 and b10H to their corresponding environmental indexes

Comparison between the transgenic cv. b10H and the parental cv. W82 for seed yield (A), seed number (B), and individual seed weight (C) across all evaluated environments (Supplementary Table 1). The mean value of each environment corresponds to the average of all tested genotypes and for each trait is described as an environmental index (EI). Fitted models in (A) differed at  $P < 0.05$  and indicated that b10H will outyield W82 across all environments with seed yield lower than  $4898 \text{ kg ha}^{-1}$ , a threshold never met in current research. No cross-over interaction was detected for models fitted to seed numbers (B) and seed weight (C). Ordinates of models fitted in (B) and (C) differed at  $P < 0.0001$ .

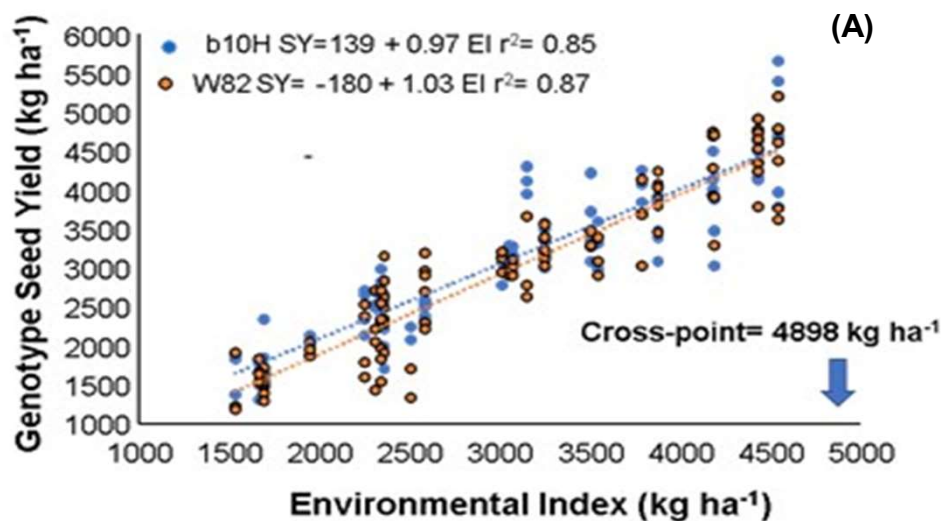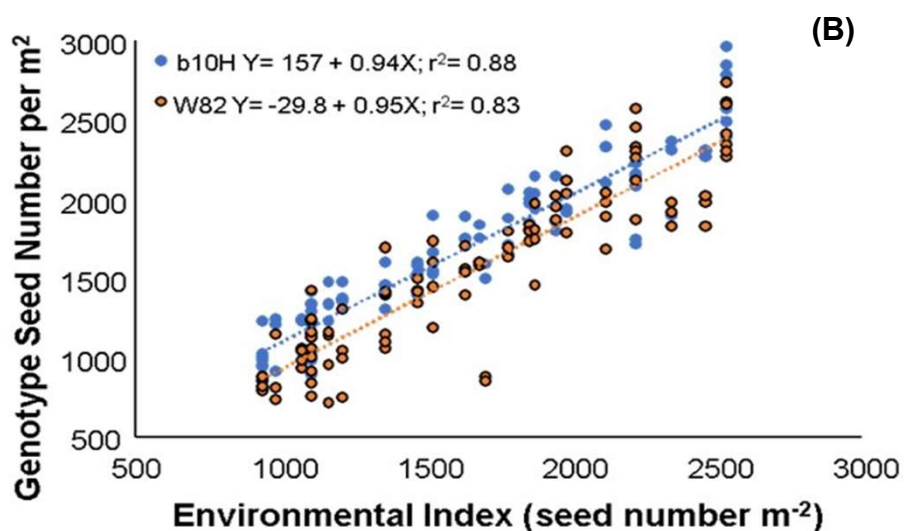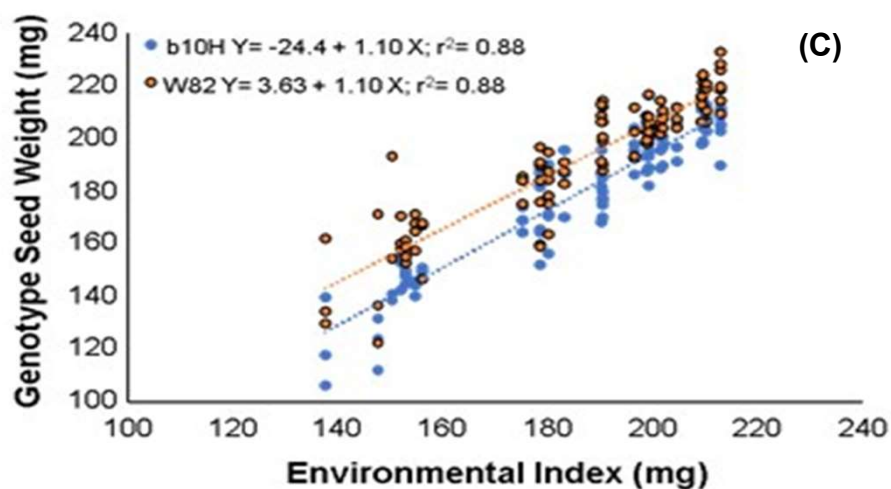

**Supplementary Figure 2.**

**Biological replicates of histological stem cuts of W82 and b10H transgenic plants grown in the greenhouse (replicates of images shown in Figure 4C-F).**

Stems of V5 plants in well-watered (WW) and water-deficit (WD) plants of TG b10H and WT W82. Internodes (epicotyls, 1<sup>st</sup>, 2<sup>nd</sup> and 3<sup>rd</sup>) slices stained with safranine-fast green (left images) and the same slices with highlighted xylem area (right panel). Bar length = 1 mm.

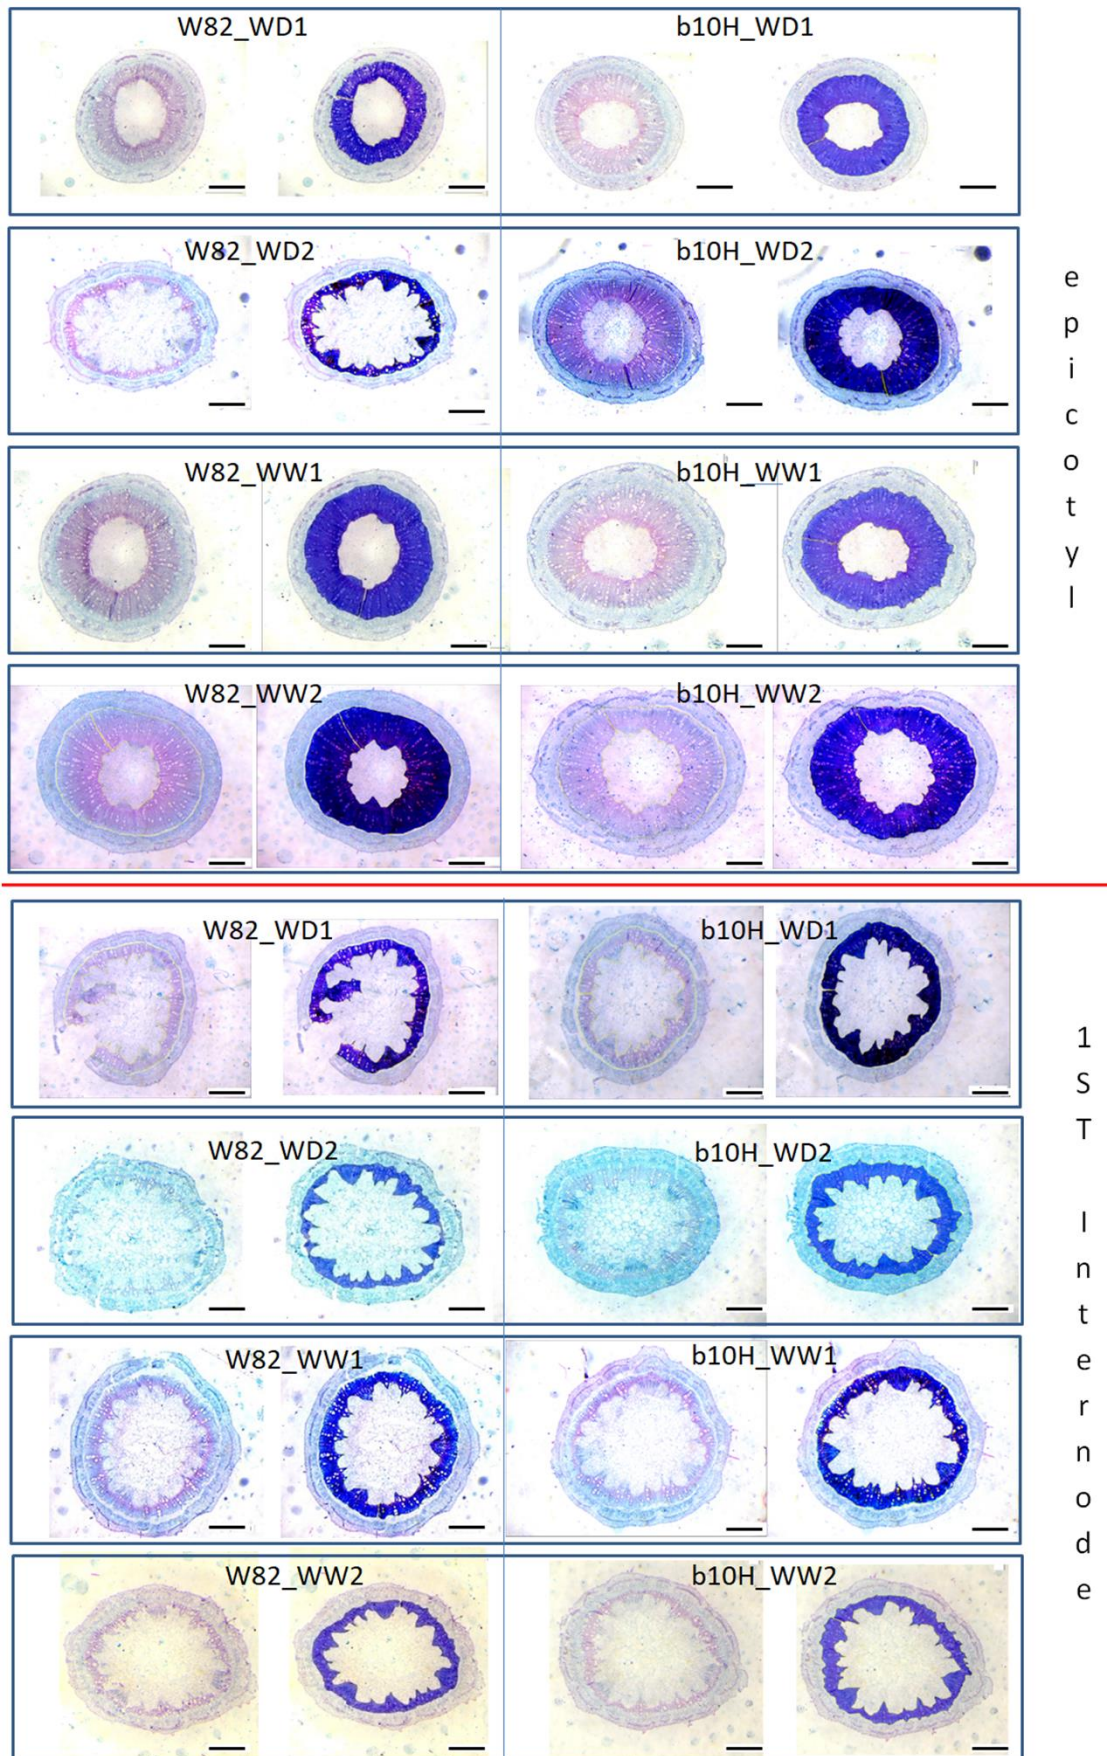

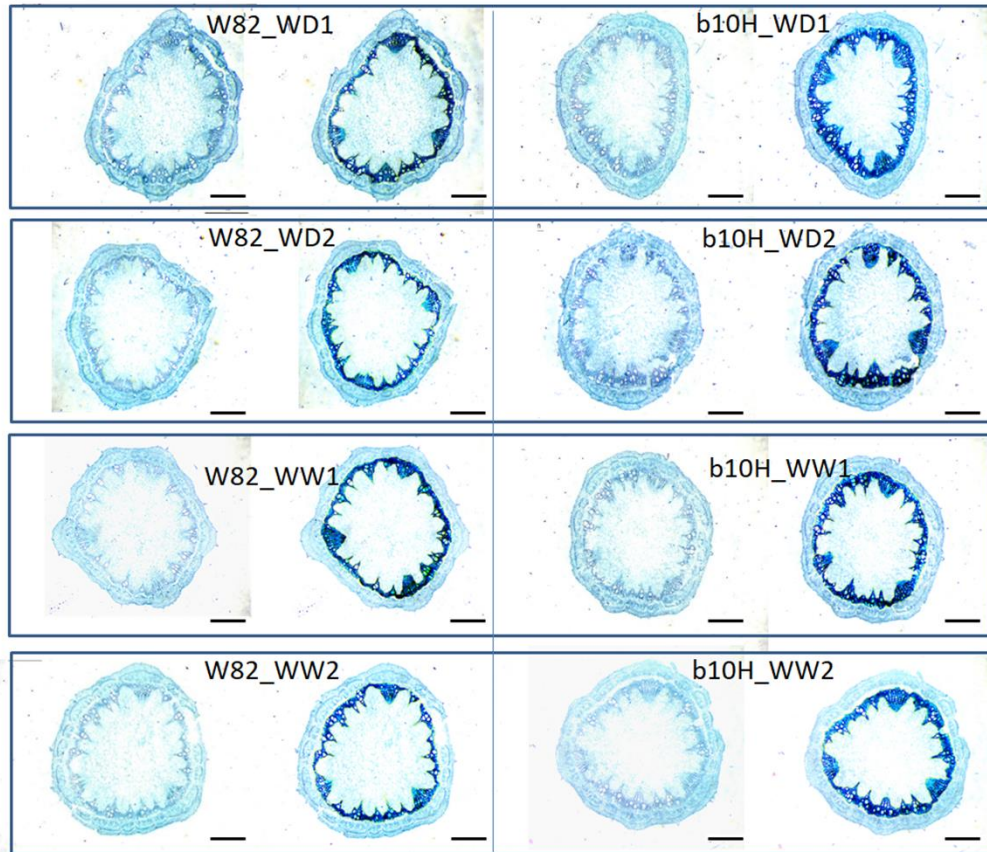

2  
n  
d  
  
I  
n  
t  
e  
r  
n  
o  
d  
e

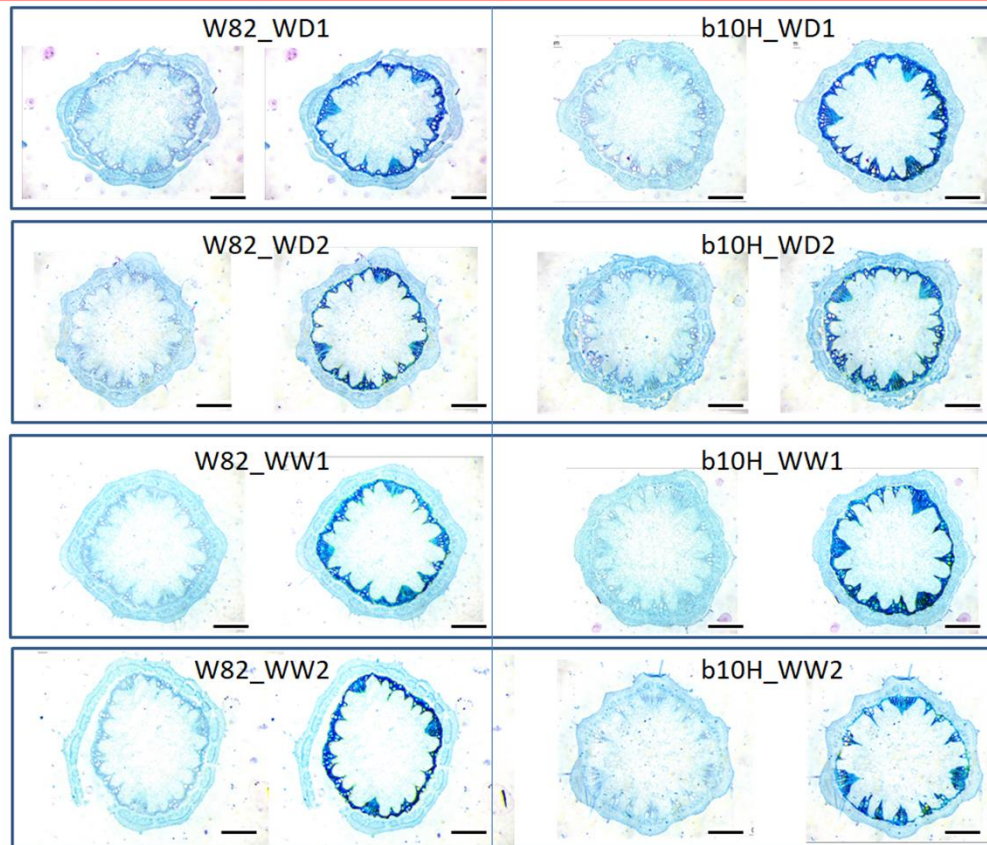

3  
r  
d  
  
I  
n  
t  
e  
r  
n  
o  
d  
e

**Supplementary Figure 3.**

**Biological replicates of histological stem cuts of W82 and b10H plants grown in the field at the IAL site (2017-2018; replicates of images shown in Figure 6C-D).**

Stem (V2 hypocotyls and epicotyls) slices stained with safranin-fast green (left images) and the same slices with highlighted xylem area (right panel). b10H are transgenic plants and W82 are wild type controls. Bar length = 0.5 mm.

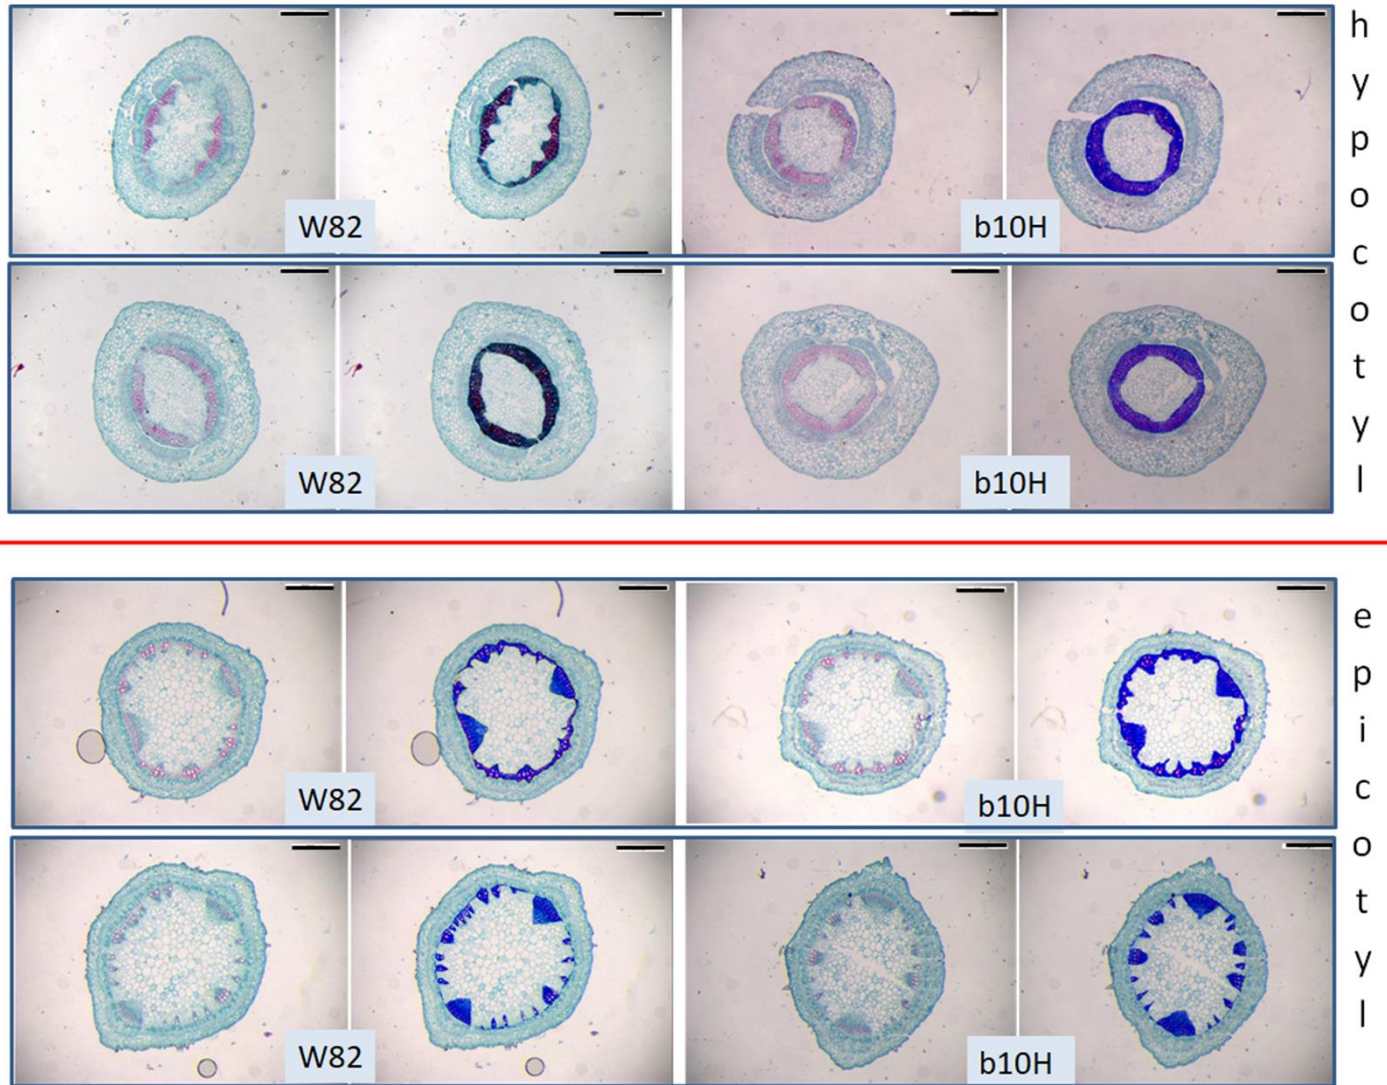

### Supplementary Table 1. Description of experiments.

Data correspond to weather conditions experienced during the whole cycle by field-grown soybean crops in 27 experiments performed across 6 years and 14 sites of Argentina. Sites are indicated in the map of Fig. 2A. Different water regimes (IR: irrigated; R: rainfed; WD: water deficit with rain-out shelters), sowing dates (ES: early sowing; DS: delayed sowing), and phosphorus fertilizer rates (MAP: monoammonium phosphate, in kg ha<sup>-1</sup>) were included in the network. Groups refer to the scope of different experiments (G1 for event selection, G2 for genotype × environment evaluation and G3 for physiological analysis). Within each column, the color scale goes from dark green for the smallest value to dark red for the largest value, except for Rain+IR (opposite scale). ID: identification; SRc: cumulative incident solar radiation; Tmax: mean daily maximum temperature; Tmin: mean daily minimum temperature; Tmean: mean daily mean temperature; PET: potential evapotranspiration; Rain+IR: rainfall+irrigation; WB: water balance (WB= Rain+IR-PET); RWB: relative water balance ( $RWB = \frac{Rain+IR-PET}{PET}$ ).

| Site in map | Harvest year | Experiment description | Water management | ID    | Groups | SRc                | Tmax | Tmin | Tmean | PET | Rain+IR | WB   | RWB   |
|-------------|--------------|------------------------|------------------|-------|--------|--------------------|------|------|-------|-----|---------|------|-------|
|             |              |                        |                  |       |        | MJ m <sup>-2</sup> | °C   | °C   | °C    | mm  | mm      | mm   |       |
| 1           | 2013         | 01. Aranguren ES       | Rainfed          | AR1a  | G1, G2 | 2726               | 30.8 | 17.2 | 24.0  | 618 | 365     | -253 | -0.41 |
| 1           | 2013         | 02. Aranguren DS       | Rainfed          | AR1b  | G1, G2 | 2263               | 30.2 | 16.3 | 23.1  | 641 | 310     | -331 | -0.52 |
| 1           | 2014         | 03. Aranguren MAP_0    | Rainfed          | AR2a  | G2     | 1714               | 29.1 | 17.7 | 23.4  | 360 | 325     | -35  | -0.10 |
| 1           | 2014         | 04. Aranguren MAP_100  | Rainfed          | AR2b  | G2     | 1714               | 29.1 | 17.7 | 23.4  | 360 | 325     | -35  | -0.10 |
| 2           | 2013         | 05. Carmen de Areco ES | Rainfed          | CA1   | G1, G2 | 2990               | 29.8 | 15.6 | 22.8  | 644 | 496     | -148 | -0.23 |
| 2           | 2013         | 06. Carmen de Areco DS | Rainfed          | CA2   | G1, G2 | 2915               | 27.5 | 13.9 | 20.6  | 615 | 379     | -236 | -0.38 |
| 3           | 2013         | 07. Corral de Bustos   | Rainfed          | CB    | G1, G2 | 2765               | 29.0 | 15.1 | 21.8  | 574 | 337     | -237 | -0.41 |
| 4           | 2013         | 08. Chilibroste        | Rainfed          | CH    | G1, G2 | 2908               | 30.6 | 15.7 | 22.8  | 646 | 407     | -239 | -0.37 |
| 5           | 2012         | 09. Hughes             | Rainfed          | HU1   | G1, G2 | 2571               | 25.8 | 13.5 | 19.3  | 766 | 539     | 228  | 0.30  |
| 5           | 2013         | 10. Hughes             | Rainfed          | HU2   | G1, G2 | 2668               | 28.0 | 14.8 | 21.3  | 575 | 341     | -234 | -0.41 |
| 6           | 2018         | 11. IAL-Santa Fe       | Irrigated        | IAL   | G2, G3 | 2884               | 32.4 | 19.1 | 25.6  | 688 | 766     | 78   | 0.11  |
| 7           | 2013         | 12. Landeta            | Rainfed          | LA    | G1, G2 | 2272               | 28.2 | 14.3 | 21.0  | 489 | 329     | -160 | -0.33 |
| 8           | 2010         | 13. Liborio Luna R     | Rainfed          | LL1   | G2, G3 | 2586               | 29.0 | 14.6 | 21.4  | 564 | 404     | -161 | -0.28 |
| 8           | 2010         | 14. Liborio Luna IR    | Irrigated        | LL2   | G2, G3 | 2586               | 29.0 | 14.6 | 21.4  | 564 | 570     | 5    | 0.01  |
| 9           | 2013         | 15. Monte Buey         | Rainfed          | MB1   | G1, G2 | 3440               | 28.9 | 15.0 | 21.7  | 744 | 323     | -421 | -0.57 |
| 9           | 2014         | 16. Monte Buey         | Rainfed          | MB2   | G2     | 2194               | 28.2 | 15.6 | 21.8  | 478 | 580     | 102  | 0.21  |
| 10          | 2018         | 17. Pergamino WD       | Water Deficit    | Pe1_D | G2, G3 | 2637               | 31.6 | 16.5 | 23.9  | 602 | 152     | -451 | -0.75 |
| 10          | 2018         | 18. Pergamino IR       | Irrigated        | Pe1_I | G2, G3 | 2637               | 31.6 | 16.5 | 23.9  | 602 | 332     | -270 | -0.45 |
| 10          | 2019         | 19. Pergamino IR       | Irrigated        | Pe2_I | G2, G3 | 2624               | 27.8 | 16.2 | 22.1  | 569 | 682     | 113  | 0.20  |
| 10          | 2019         | 20. Pergamino R        | Rainfed          | Pe2_R | G2, G3 | 2624               | 27.8 | 16.2 | 22.1  | 569 | 806     | 237  | 0.42  |
| 11          | 2010         | 21. Quimili            | Rainfed          | QU    | G1, G2 | 1868               | 32.5 | 20.3 | 26.1  | 451 | 377     | -75  | -0.17 |
| 12          | 2014         | 22. Roldán ES          | Rainfed          | RO1   | G2     | 2169               | 30.3 | 18.3 | 24.2  | 502 | 475     | -27  | -0.05 |
| 12          | 2014         | 23. Roldán DS          | Rainfed          | RO2   | G2     | 2230               | 27.7 | 16.2 | 21.8  | 480 | 571     | 91   | 0.19  |
| 13          | 2013         | 24. San Agustín ES     | Rainfed          | SA1   | G1, G2 | 3172               | 25.6 | 12.0 | 18.4  | 637 | 350     | -287 | -0.45 |
| 13          | 2013         | 25. San Agustín DS     | Rainfed          | SA2   | G1, G2 | 3002               | 25.5 | 11.9 | 18.3  | 602 | 376     | -226 | -0.38 |
| 14          | 2013         | 26. Villa Saboya       | Rainfed          | VS1   | G1, G2 | 2426               | 29.0 | 14.7 | 21.6  | 528 | 252     | -276 | -0.52 |
| 14          | 2014         | 27. Villa Saboya       | Rainfed          | VS2   | G2     | 2306               | 28.9 | 15.7 | 22.2  | 508 | 459     | -49  | -0.10 |
